# Supplementary material for: A highly selective SBA-15 supported fluorescent “turn-on” sensor for the fluoride anion
Source: Royal Society of Chemistry journal article supplement (doi:10.1039/c5nj00495k), 2015-01-01
Supplement: c5nj00495k1.pdf [file c5nj00495k1.pdf]

## Electronic Supplementary Information

### A highly selective SBA-15 supported fluorescence “turn-on” sensor for fluoride anion

Richard Appiah-Ntiamoah, Wook-Jin Chung, Hern Kim\*

*Department of Energy Science and Technology, Energy and Environment Fusion Technology Center,  
Myongji University, Yongin, Gyeonggi-do 449-728, Republic of Korea*

\*Corresponding author: hernkim@mju.ac.kr, Tel: +82 31 330 6688; fax: +82 31 336 6336.

#### Table of contents:

|                                                                                                                                                                                                                                                                                                                                                                                                                                                                                                                                                                                                                                                                                                                                                                                                        |     |
|--------------------------------------------------------------------------------------------------------------------------------------------------------------------------------------------------------------------------------------------------------------------------------------------------------------------------------------------------------------------------------------------------------------------------------------------------------------------------------------------------------------------------------------------------------------------------------------------------------------------------------------------------------------------------------------------------------------------------------------------------------------------------------------------------------|-----|
| Title of contents.....                                                                                                                                                                                                                                                                                                                                                                                                                                                                                                                                                                                                                                                                                                                                                                                 | 1-2 |
| <b>Fig. S1</b> (a) Nitrogen adsorption–desorption isotherms and (b) Barrett–Joyner–Halenda (BJH) pore diameters of SBA-15, <b>ASBA</b> , and <b>TSBA</b> .....                                                                                                                                                                                                                                                                                                                                                                                                                                                                                                                                                                                                                                         | 3   |
| <b>Fig. S2</b> Fluorescence intensity increment ( $F-F_0$ ) of <b>ASBA</b> ( $88.0 \text{ mg mL}^{-1}$ ) and <b>TSBA</b> ( $72.0 \text{ mg mL}^{-1}$ ) recorded at 526 nm at different times upon adding $1.000 \text{ }\mu\text{M}$ of $\text{F}^-$ in pH 7.4 HEPES buffered water ( $\lambda_{\text{ex}} = 496 \text{ nm}$ ).....                                                                                                                                                                                                                                                                                                                                                                                                                                                                    | 4-6 |
| <b>Fig. S3</b> (a) Fluorescence intensity increment ( $F-F_0$ ) of <b>TSBA</b> ( $88.0 \text{ mg mL}^{-1}$ ) at 526 nm at different concentrations of $\text{F}^-$ ( $0.0\text{-}1500 \text{ }\mu\text{M}$ ) in pH 7.4 HEPES buffered water ( $\lambda_{\text{ex}} = 496 \text{ nm}$ ). Insert: enlarged figure in the concentration range of $0.2\text{-}0.75 \text{ }\mu\text{M}$ of fluoride anion and (b) Fluorescence intensity increment ( $F-F_0$ ) of <b>ASBA</b> ( $72.0 \text{ mg mL}^{-1}$ ) at 526 nm at different concentrations of $\text{F}^-$ ( $0.0\text{-}1500 \text{ }\mu\text{M}$ ) in pH 7.4 HEPES buffered water ( $\lambda_{\text{ex}} = 496 \text{ nm}$ ). Insert: enlarged Figure in the concentration range of $10.0\text{-}90.0 \text{ }\mu\text{M}$ of fluoride anion..... | 7   |
| <b>Fig. S4</b> IR spectra of spent <b>TSBA</b> and <b>TM-FITC</b> .....                                                                                                                                                                                                                                                                                                                                                                                                                                                                                                                                                                                                                                                                                                                                | 8   |
| <b>Fig. S5</b> Absorption spectra of <b>TSBA</b> ( $88.0 \text{ mg mL}^{-1}$ ) in 7.4 pH HEPES buffered water upon addition the same concentration of $\text{F}^-$ , $\text{HPO}_4^{2-}$ , $\text{AcO}^-$ , $\text{Cl}^-$ , $\text{Br}^-$ , $\text{I}^-$ , and $\text{NO}_3^-$ ..                                                                                                                                                                                                                                                                                                                                                                                                                                                                                                                      | 9   |

**Fig. S6** Fluorescence spectra of **TM** and **TM-FITC** in the absence and presence of 1000  $\mu\text{M}$  solutions of  $\text{F}^-$ ,  $\text{HPO}_4^{2-}$ ,  $\text{AcO}^-$ ,  $\text{Cl}^-$ ,  $\text{Br}^-$ ,  $\text{I}^-$ , and  $\text{NO}_3^-$  .....10

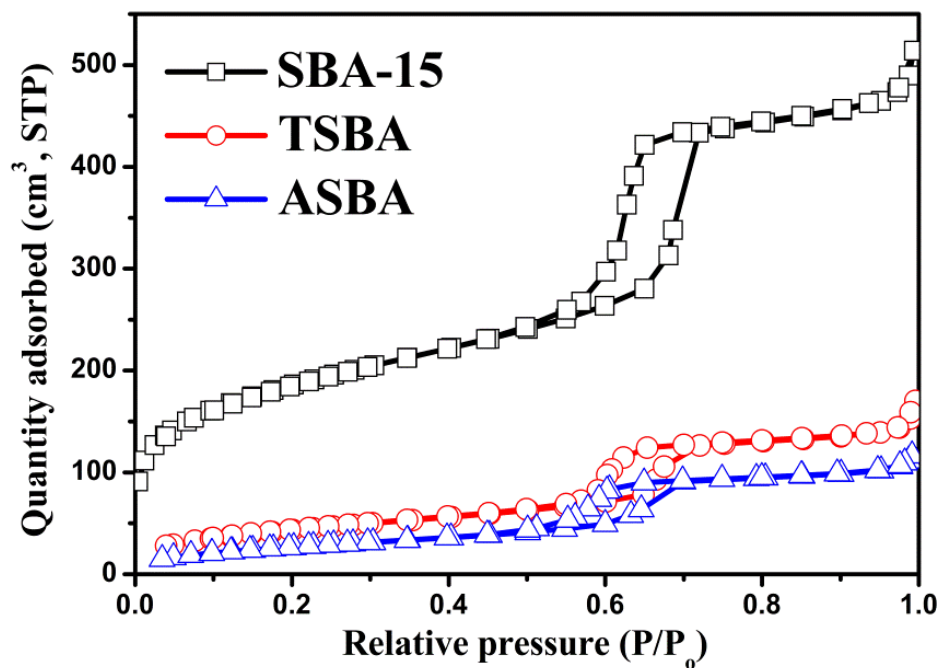

(a)

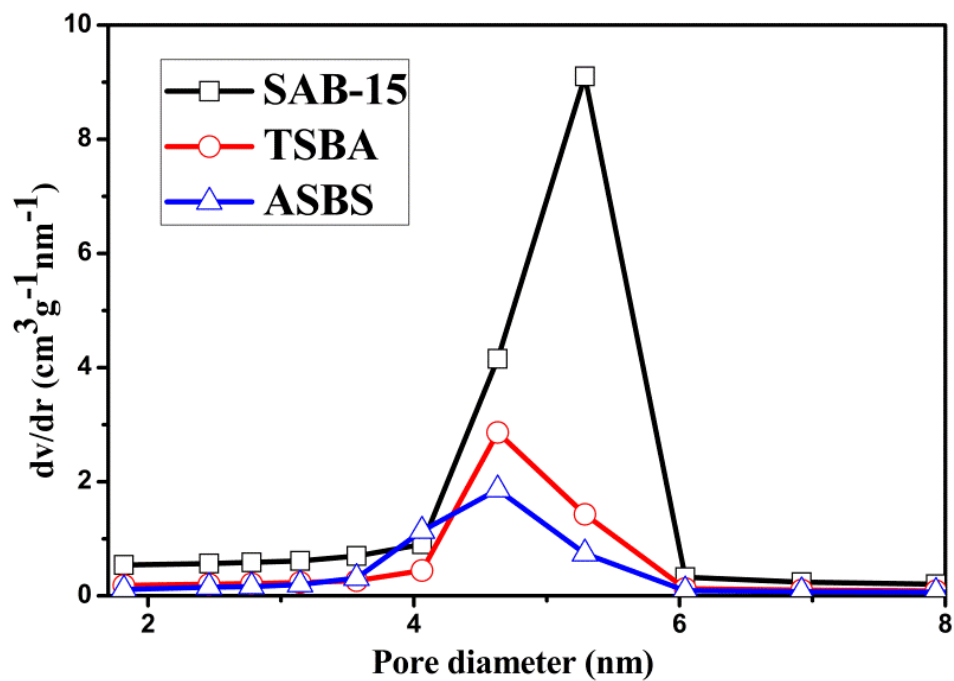

(b)

Fig. S1

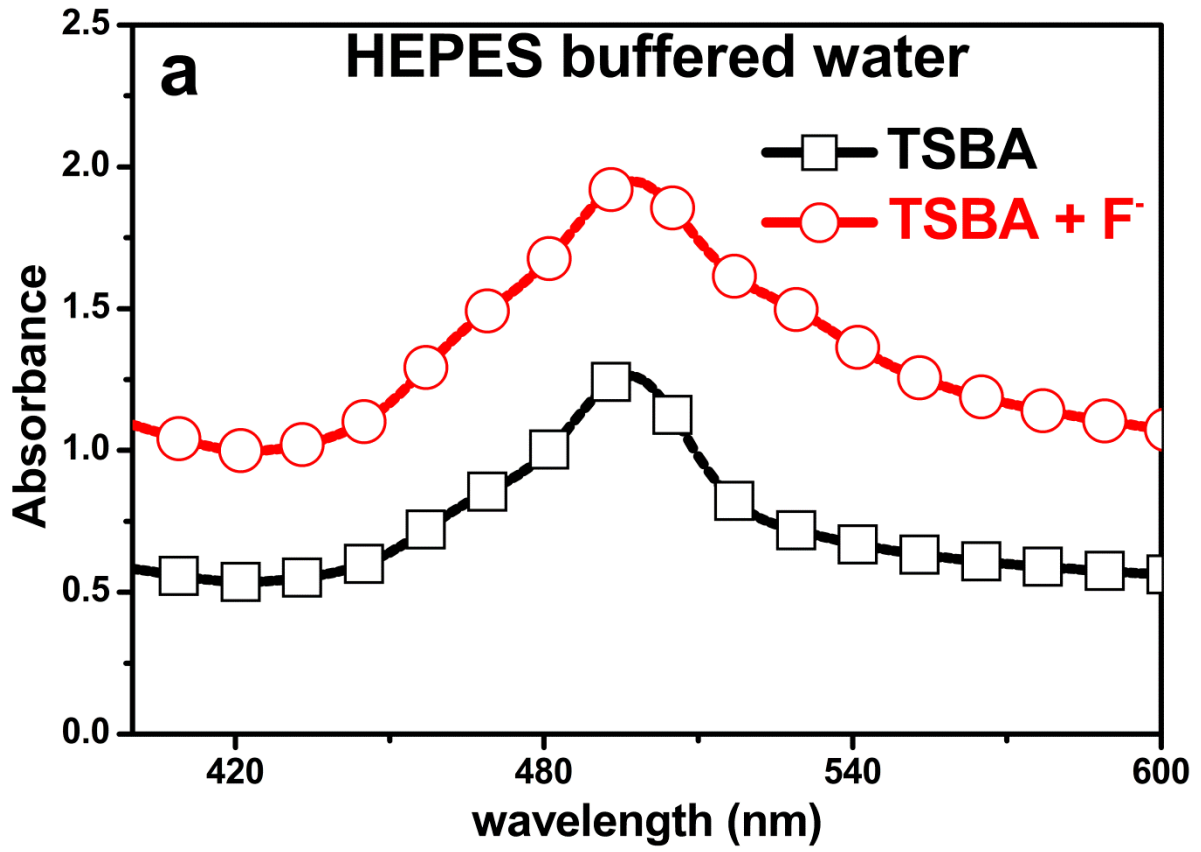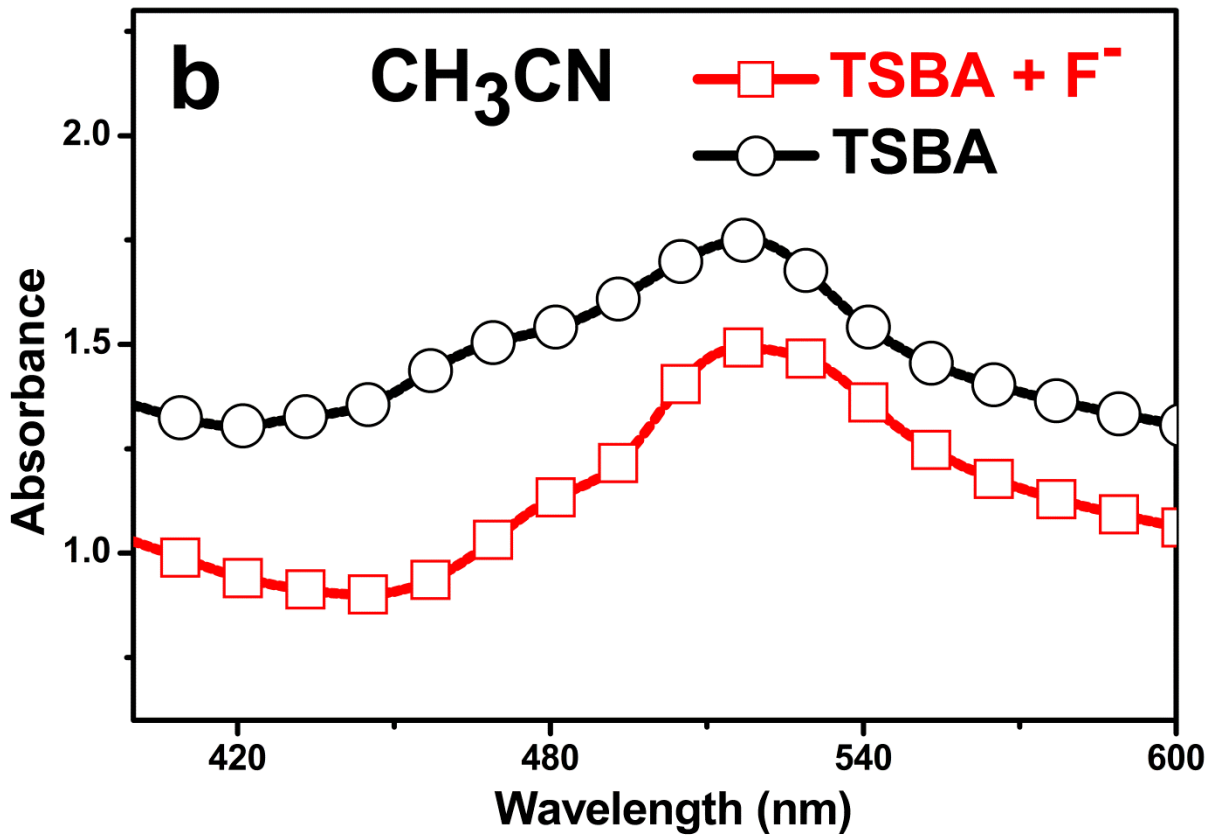

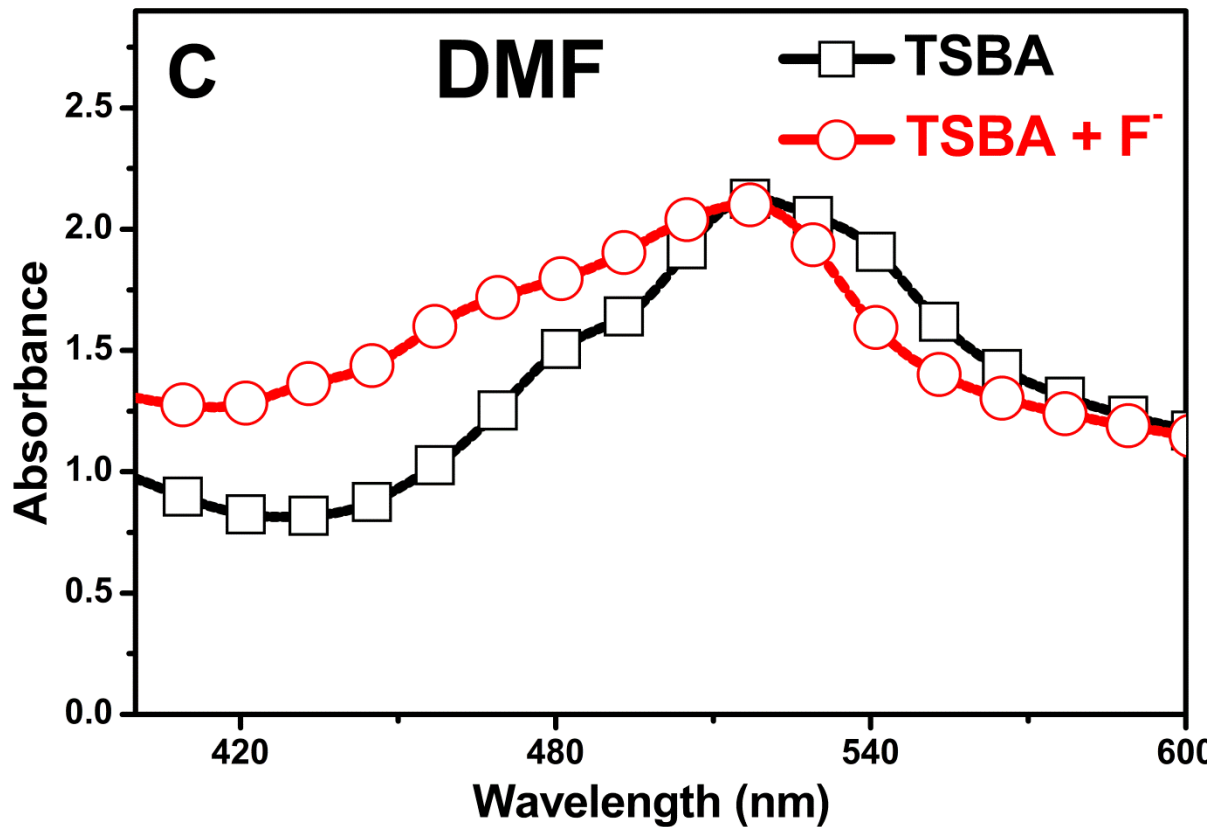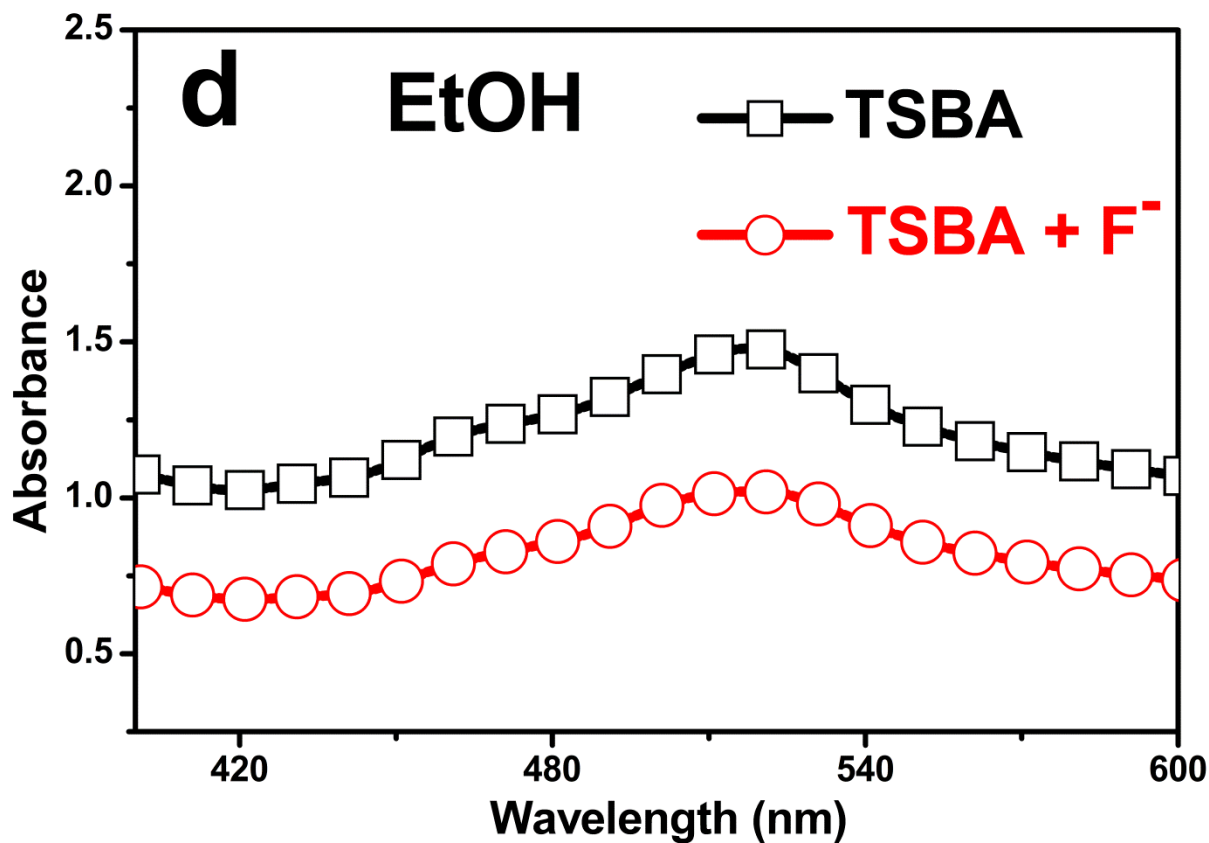

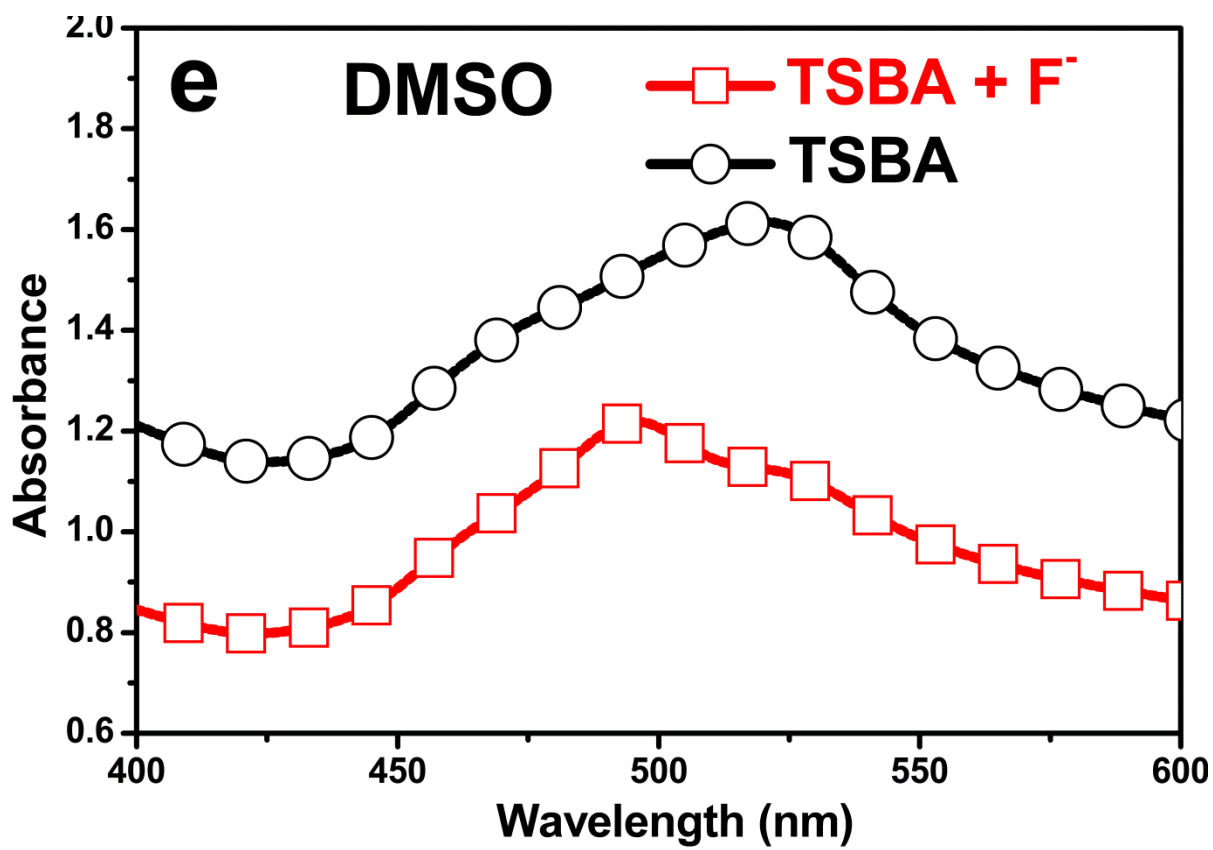

Fig. S2

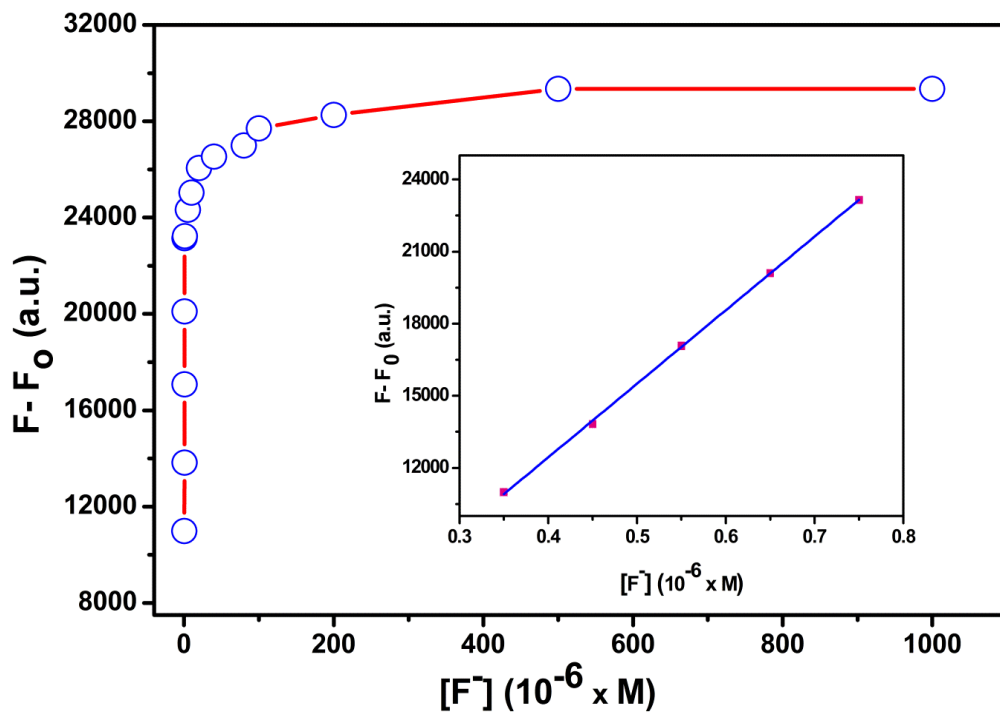

(a)

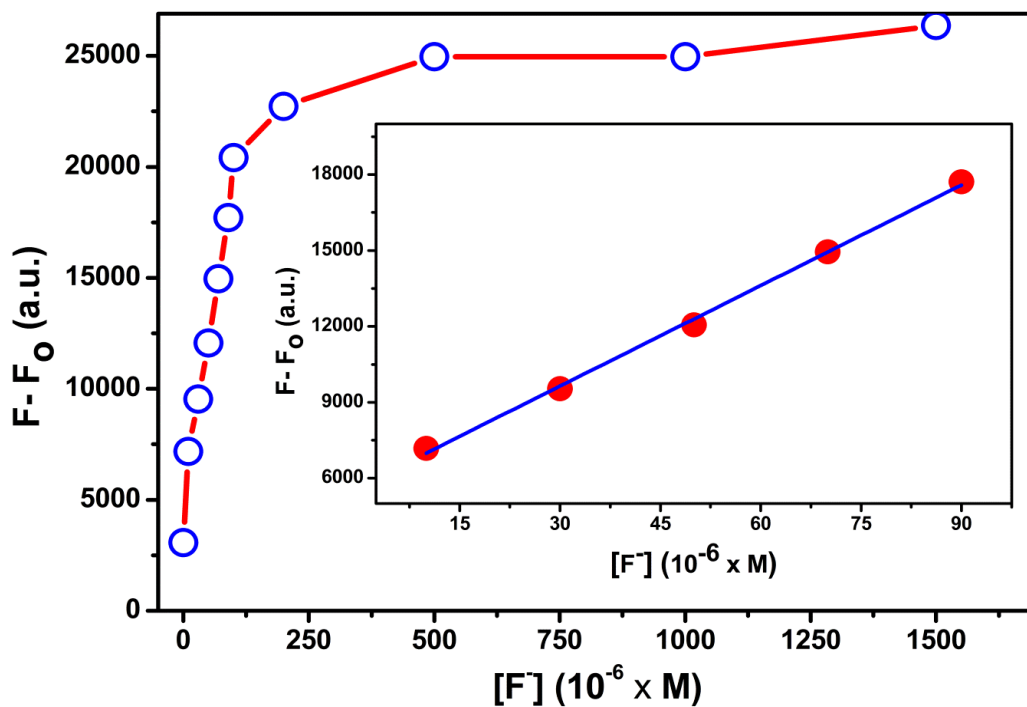

(b)

Fig. S3

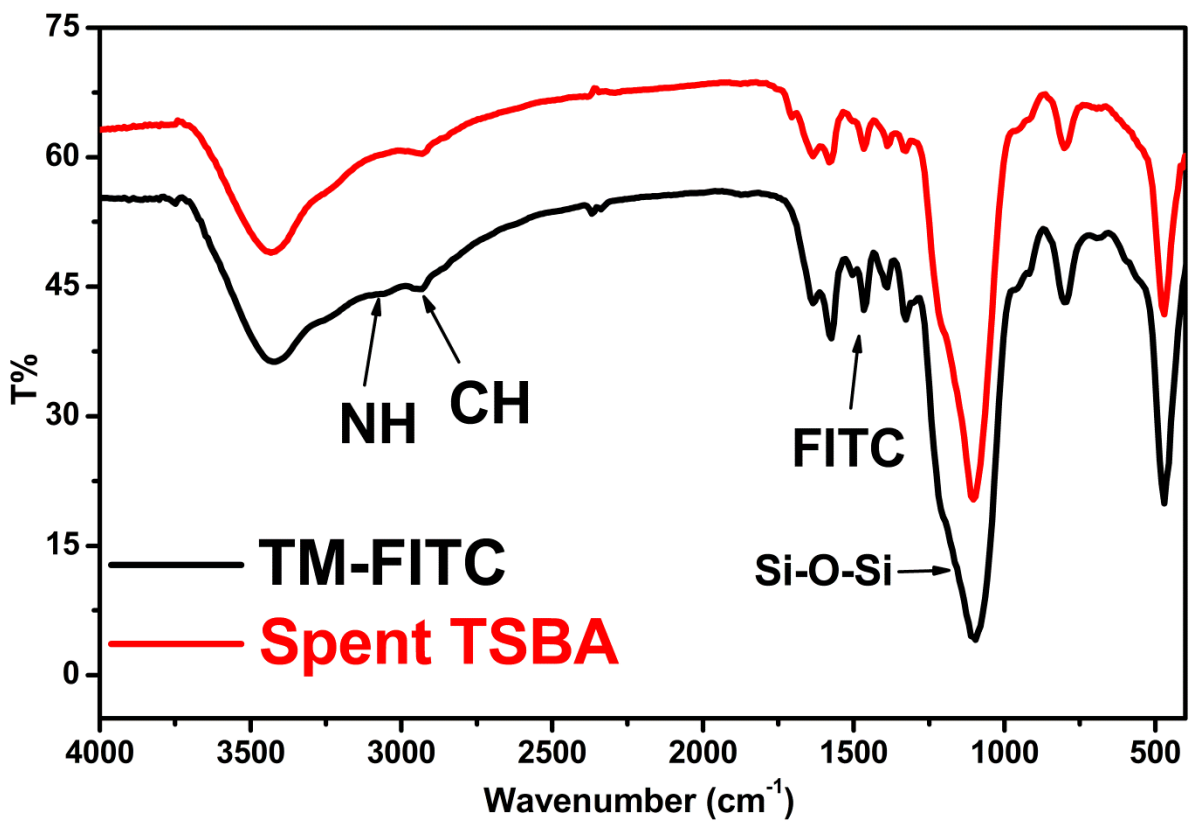

Fig. S4



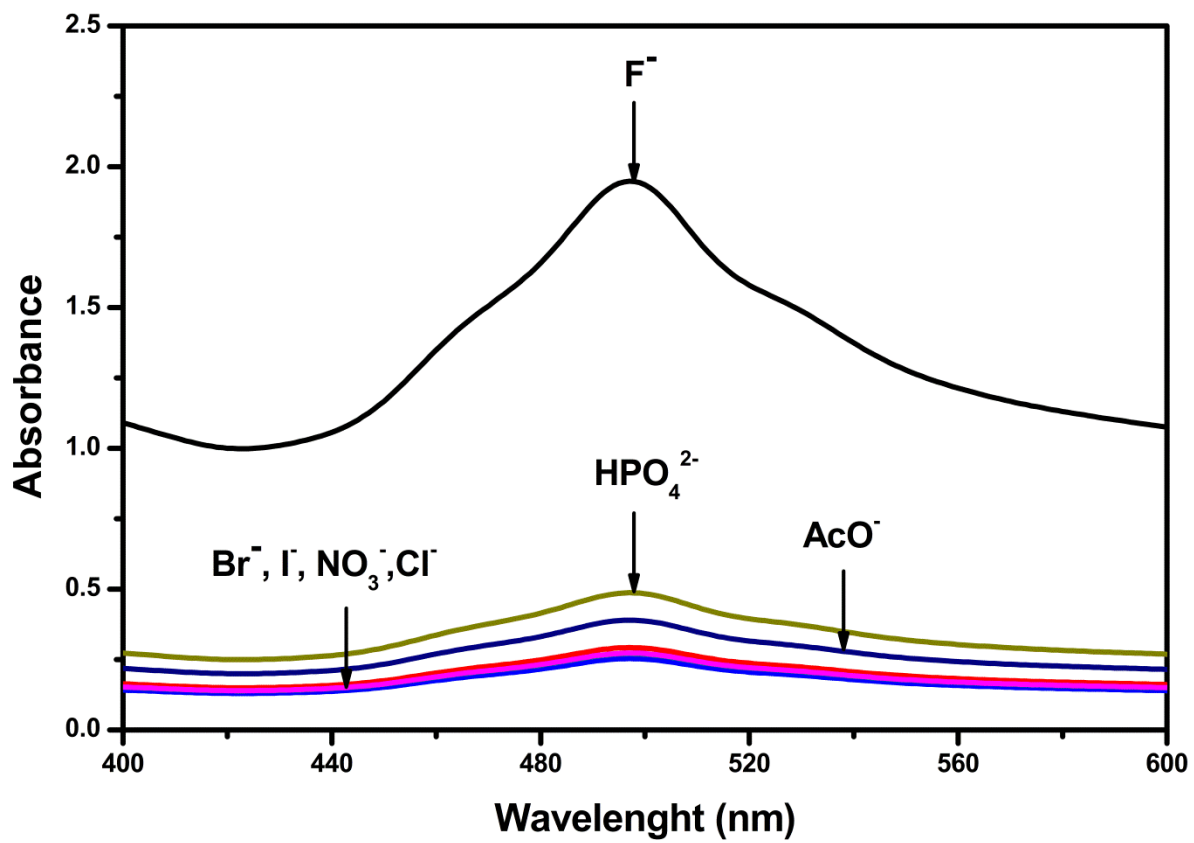

Fig. S5

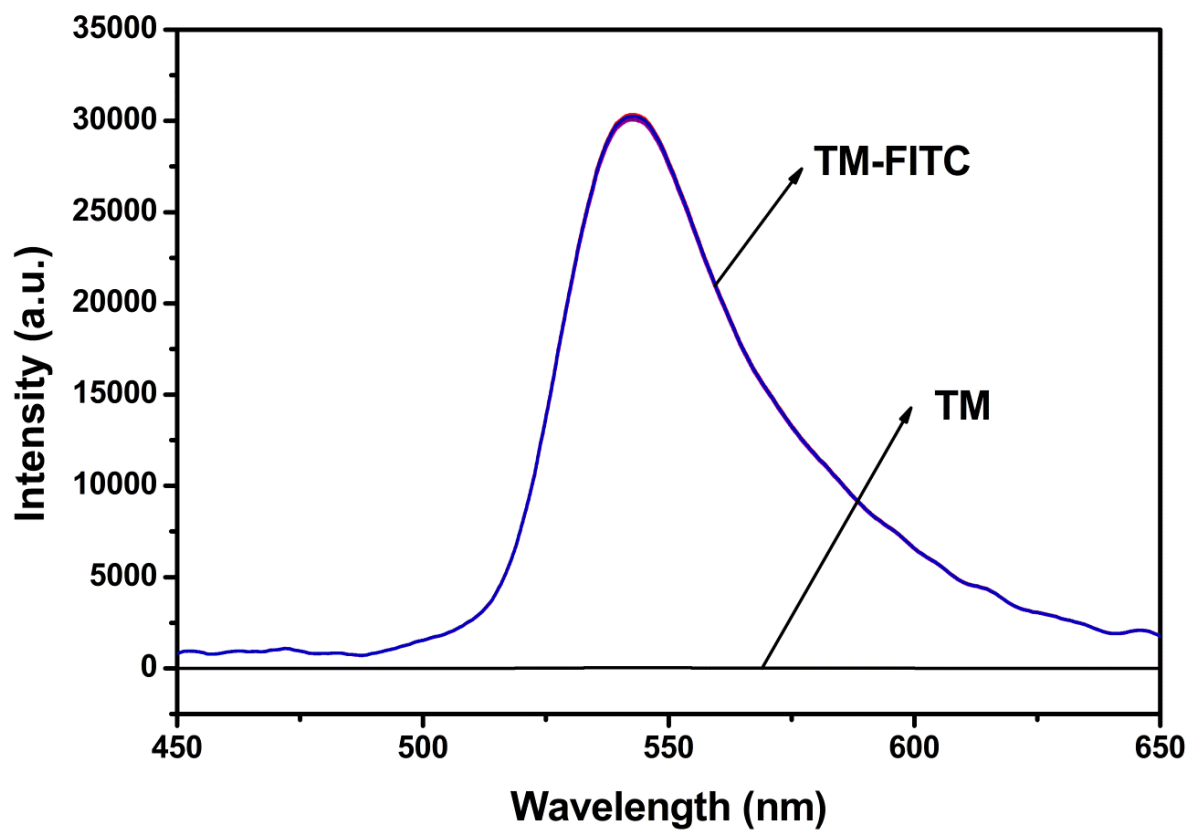

Fig. S6
